# Supplementary material for: Achieving high volumetric energy density in graphite anodes through polymer coating with improved electrolyte impregnation
Source: Royal Society of Chemistry journal article supplement (doi:10.1039/d4ta03017f), 2024-01-01
Supplement: d4ta03017f1.pdf [file d4ta03017f1.pdf]

**Supplementary information**

**Achieving High Volumetric Energy Density in Graphite Anode through Polymer  
Coating with Improved Electrolyte Impregnation**

Jueun Kim<sup>1#</sup>, S. Jayasubramaniyan<sup>2#</sup>, Seokjin Kim<sup>1</sup>, Donghwi Kim<sup>3</sup>, Minseok Ko<sup>1</sup>, N. S. Reddy<sup>3</sup>, Kwon-Koo Cho<sup>1,2</sup>, Yoon-Gyo Cho<sup>4</sup>, Sang Yong Nam<sup>1,2\*</sup>, Woongrae Cho<sup>5\*</sup>, Jaekyung Sung<sup>1,3\*</sup>

<sup>1</sup>Department of Materials Engineering and Convergence Technology, Gyeongsang National University, Jinju, 52828, Republic of Korea

<sup>2</sup>Research Institute for Green Energy Convergence Technology, Gyeongsang National University, Jinju, 52828, Republic of Korea

<sup>3</sup>School of Materials Science and Engineering, Engineering Research Institute, Gyeongsang National University, Jinju, 52828, Republic of Korea

<sup>4</sup>Battery R&D, R&D campus, LG Energy Solution, Daejeon 34122, Republic of Korea

<sup>5</sup>Analysis Solution Center, SK Innovation, Daejeon, Republic of Korea

#J. Kim and S. Jayasubramaniyan contributed equally to this work

E-mail: walden@gnu.ac.kr, fo920305@naver.com, jksung@gnu.ac.kr

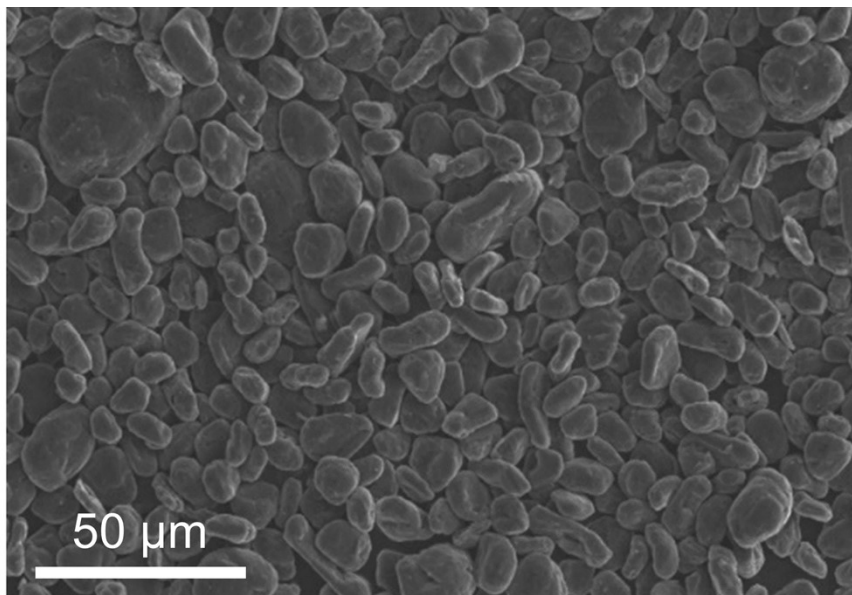

**Fig. S1.** SEM image displaying the morphology of pristine graphite

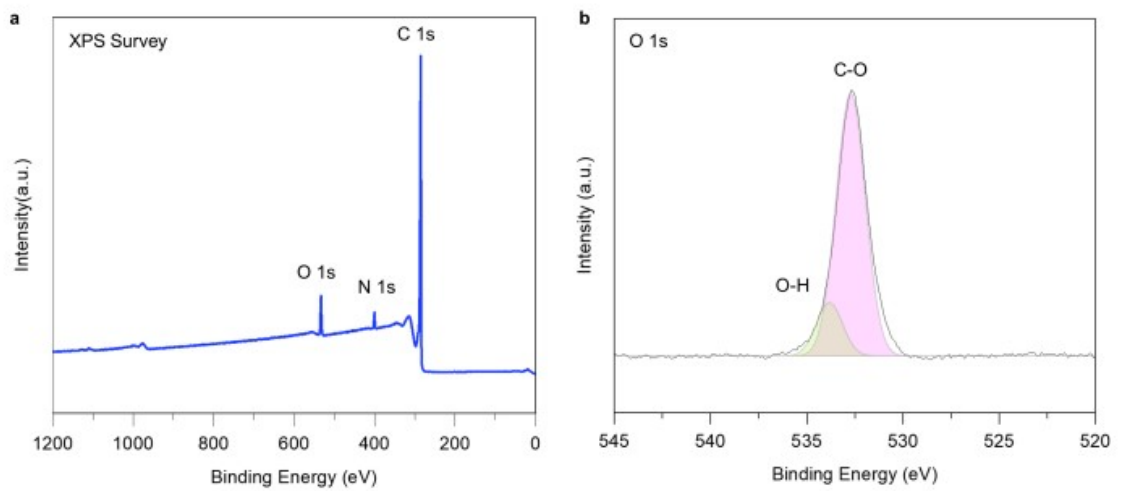

**Fig. S2.** (a) XPS survey and (b) the XPS result of O 1s for P-graphite.

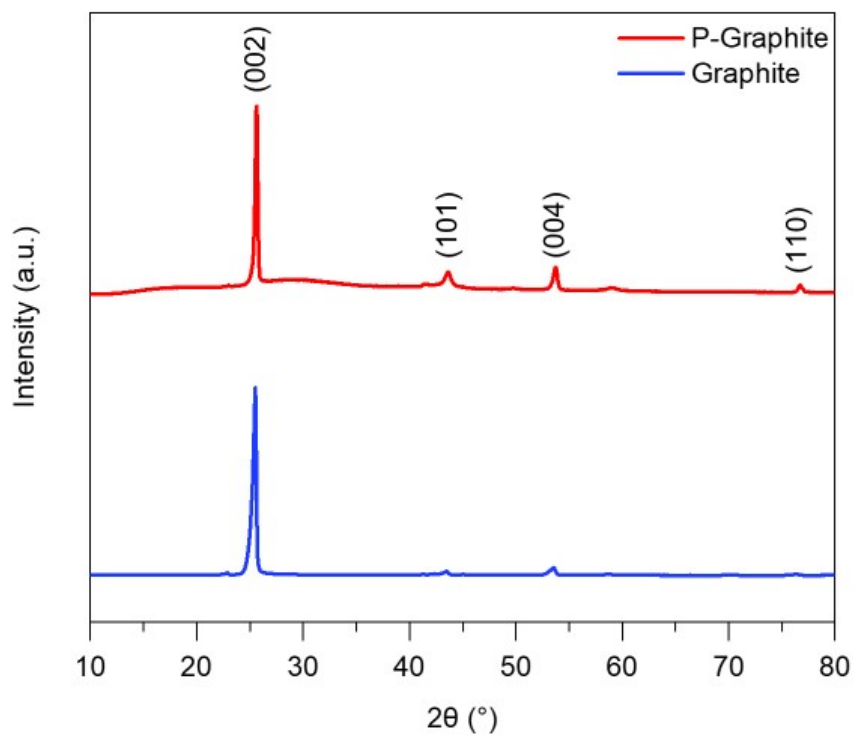

**Figure S3.** XRD results of pristine graphite and PVA-CN coated graphite.
